# Supplementary material for: Microsolvation of 2-azetidinone: a model for the peptide group–water interactions
Source: Royal Society of Chemistry journal article supplement (doi:10.1039/c4cp04577g), 2014-12-05
Supplement: c4cp04577g1.pdf [file c4cp04577g1.pdf]

## **Microsolvation of 2-azetidinone: a model for the peptide group-water interactions.**

Juan C. López,\* Raquel Sánchez, Susana Blanco and José L. Alonso,

Grupo de Espectroscopía Molecular (GEM), Universidad de Valladolid, Laboratorios de Espectroscopía y Bioespectroscopía, Edificio Quifima, Campus Miguel Delibes, 47011 Valladolid, Spain

E-mail: [jclopez@qf.uva.es](mailto:jclopez@qf.uva.es), [sblanco@qf.uva.es](mailto:sblanco@qf.uva.es), [jalonso@qf.uva.es](mailto:jalonso@qf.uva.es)

ELECTRONIC SUPPLEMENTARY INFORMATION

**Table S1.** Observed and calculated frequencies (MHz) for the parent species of the 1:1a complex of 2-azetidinone $\cdots$ H<sub>2</sub>O

| $J'K'_-J'K'_+$ | $J''K''_-J''K''_+$ | $F'F''$   | <i>obs.</i> | <i>obs.-cal.</i> | $J'K'_-J'K'_+$ | $J''K''_-J''K''_+$ | $F'F''$   | <i>obs.</i>   | <i>obs.-cal.</i> |        |
|----------------|--------------------|-----------|-------------|------------------|----------------|--------------------|-----------|---------------|------------------|--------|
| 2 0 2 1 0 1    | 1 1                | 1 1       | 7658.986    | 0.003            | 4 1 4 3 1 3    | 3 3                | 14309.286 | 0.000         |                  |        |
|                |                    |           | 7660.062    | -0.001           |                |                    |           | 5 4 14311.153 | -0.001           |        |
|                |                    |           | 7660.202    | 0.002            |                |                    |           | 4 3 14311.300 | -0.001           |        |
|                |                    |           | 7660.593    | -0.004           |                |                    |           | 4 4 14312.758 | 0.001            |        |
|                |                    |           | 7660.846    | 0.001            |                |                    |           | 4 3 16328.117 | -0.001           |        |
| 2 1 2 1 1 1    | 1 1                | 1 1       | 7193.020    | 0.000            | 4 1 3 3 1 2    | 3 2                | 16328.117 | -0.001        |                  |        |
|                |                    |           | 7194.173    | 0.006            |                |                    |           | 5 4 16328.182 | 0.003            |        |
|                |                    |           | 7194.894    | 0.001            |                |                    |           | 4 3 16328.294 | -0.003           |        |
|                |                    |           | 7195.370    | -0.001           |                |                    |           | 3 2 15370.855 | 0.003            |        |
| 2 1 1 1 1 0    | 1 0                | 2 2       | 8207.861    | -0.002           | 4 2 3 3 2 2    | 3 2                | 15370.855 | 0.003         |                  |        |
|                |                    |           | 8208.753    | 0.002            |                |                    |           | 3 3 15370.855 | 0.003            |        |
|                |                    |           | 8209.264    | 0.001            |                |                    |           | 5 4 15370.934 | 0.001            |        |
|                |                    |           | 8209.874    | -0.001           |                |                    |           | 4 3 15371.249 | 0.000            |        |
|                |                    |           | 8210.672    | 0.000            |                |                    |           | 4 4 15371.249 | 0.000            |        |
| 3 0 3 2 0 2    | 2 2                | 2 2       | 11386.516   | -0.003           | 4 2 2 3 2 1    | 3 2                | 15771.958 | 0.004         |                  |        |
|                |                    |           | 11387.635   | 0.001            |                |                    |           | 5 4 15772.009 | -0.002           |        |
|                |                    |           | 11387.734   | -0.001           |                |                    |           | 4 3 15480.748 | -0.001           |        |
|                |                    |           | 11387.800   | 0.001            |                |                    |           | 4 3 15481.348 | 0.000            |        |
|                |                    |           | 11388.581   | -0.001           |                |                    |           | 5 4 15493.600 | 0.000            |        |
| 3 1 3 2 1 2    | 2 2                | 2 2       | 10764.595   | -0.002           | 5 1 5 4 1 4    | 6 5                | 17824.178 | 0.002         |                  |        |
|                |                    |           | 10766.313   | 0.003            |                |                    |           | 4 3 17824.241 | 0.001            |        |
|                |                    |           | 10767.768   | 0.001            |                |                    |           | 5 4 17824.286 | -0.001           |        |
|                |                    |           | 10767.768   | 0.001            |                |                    |           | 0 1 8216.875  | 0.000            |        |
| 3 1 2 2 1 1    | 3 3                | 3 3       | 12286.335   | 0.000            | 1 1 1 0 0 0    | 0 1                | 8217.592  | 0.000         |                  |        |
|                |                    |           | 12286.487   | 0.005            |                |                    |           | 1 1 8218.068  | -0.002           |        |
|                |                    |           | 12286.654   | -0.001           |                |                    |           | 1 1 11559.623 | 0.004            |        |
|                |                    |           | 12286.848   | 0.001            |                |                    |           | 3 2 11560.935 | 0.002            |        |
|                |                    |           | 12287.279   | -0.001           |                |                    |           | 1 0 11561.231 | -0.001           |        |
| 3 2 2 2 2 1    | 2 1                | 11552.185 | -0.002      | 2 2 11562.138    | 2 2            | 11562.138          | 0.001     |               |                  |        |
|                |                    |           | 11552.571   |                  |                |                    | 0.000     | 3 0 3 2 1 2   | 2 2 7485.224     | -0.004 |
|                |                    |           | 11552.571   |                  |                |                    | 0.000     | 3 2 7486.511  | 0.003            |        |
|                |                    |           | 11553.260   |                  |                |                    | -0.004    | 4 3 7486.764  | 0.000            |        |
|                |                    |           | 11553.260   |                  |                |                    | -0.004    | 2 1 7487.102  | 0.002            |        |
| 3 2 1 2 2 0    | 2 1                | 11717.244 | -0.005      | 3 1 3 2 0 2      | 2 2            | 14665.886          | -0.002    |               |                  |        |
|                |                    |           | 11717.605   |                  |                |                    | 0.003     | 4 3 14667.179 | -0.001           |        |
|                |                    |           | 11718.154   |                  |                |                    | 0.001     | 3 2 14667.852 | -0.002           |        |
| 4 0 4 3 0 3    | 5 4                | 15002.268 | 0.001       | 4 0 4 3 1 3      | 3 3            | 14668.637          | 0.001     |               |                  |        |
|                |                    |           | 15002.302   |                  |                |                    | -0.003    | 3 3 11720.971 | 0.001            |        |
|                |                    |           | 15002.462   |                  |                |                    | 0.001     | 4 3 11722.407 | 0.000            |        |
|                |                    |           | 15002.462   |                  |                |                    | 0.001     | 5 4 11722.719 | -0.001           |        |
|                |                    |           |             |                  |                |                    |           | 3 2 11722.933 | -0.002           |        |
|                |                    |           |             |                  |                |                    |           | 4 4 11723.859 | -0.003           |        |

**Table S2.** Observed and calculated frequencies (MHz) for the  $^{13}\text{C}$  species of the 1:1a complex of 2-azetidinone $\cdots\text{H}_2\text{O}$

|                    |                       |         |             |                  |             |                                | $^{13}\text{C}_{\text{C=O}}/^{12}\text{C}_{\text{C=O}}$ |                                | $^{13}\text{C}_{\alpha}/^{12}\text{C}_{\alpha}$ |  | $^{13}\text{C}_{\beta}/^{12}\text{C}_{\beta}$ |  |
|--------------------|-----------------------|---------|-------------|------------------|-------------|--------------------------------|---------------------------------------------------------|--------------------------------|-------------------------------------------------|--|-----------------------------------------------|--|
| $J'K'_{-1}K'_{+1}$ | $J''K''_{-1}K''_{+1}$ | $F'F''$ | <i>obs.</i> | <i>obs.-cal.</i> | <i>obs.</i> | <i>obs.-cal.<sup>[a]</sup></i> | <i>Obs.</i>                                             | <i>obs.-cal.<sup>[a]</sup></i> |                                                 |  |                                               |  |
| 2 0 2              | 1 0 1                 | 3 2     | 7654.248    | 0.002            | 7561.437    | 0.000                          | 7566.334                                                | 0.000                          |                                                 |  |                                               |  |
|                    |                       | 2 1     | 7654.387    | 0.003            | 7561.574    | 0.001                          | 7566.469                                                | -0.002                         |                                                 |  |                                               |  |
|                    |                       | 1 0     | -           | -                | -           | -                              | 7566.866                                                | -0.002                         |                                                 |  |                                               |  |
| 3 0 3              | 2 0 2                 | 4 3     | 11377.908   | -0.001           | 11244.121   | 0.002                          | 11247.751                                               | 0.000                          |                                                 |  |                                               |  |
|                    |                       | 3 2     | 11378.074   | -0.002           | 11244.285   | 0.003                          | 11247.918                                               | 0.000                          |                                                 |  |                                               |  |
| 3 1 3              | 2 1 2                 | 4 3     | 10756.039   | -0.001           | 10633.605   | -0.006                         | 10633.179                                               | 0.001                          |                                                 |  |                                               |  |
|                    |                       | 3 2     | 10756.293   | 0.001            | 10633.866   | 0.004                          | -                                                       | -                              |                                                 |  |                                               |  |
| 3 1 2              | 2 1 1                 | 2 1     | -           | -                | -           | -                              | 12137.924                                               | -0.005                         |                                                 |  |                                               |  |
|                    |                       | 4 3     | 12280.201   | 0.001            | 12120.282   | -0.002                         | 12138.104                                               | 0.002                          |                                                 |  |                                               |  |
|                    |                       | 3 2     | 12280.391   | -0.001           | -           | -                              | 12138.297                                               | 0.004                          |                                                 |  |                                               |  |
| 4 0 4              | 3 0 3                 | 5 4     | 14987.679   | 0.001            | 14818.346   | 0.000                          | 14817.081                                               | 0.002                          |                                                 |  |                                               |  |
|                    |                       | 3 2     | -           | -                | -           | -                              | 14817.116                                               | 0.000                          |                                                 |  |                                               |  |
|                    |                       | 4 3     | 14987.873   | 0.000            | 14818.535   | -0.002                         | 14817.272                                               | -0.002                         |                                                 |  |                                               |  |

**Table S3.** Observed and calculated frequencies (MHz) for the  $^{18}\text{O}$  species of the 1:1a complex of 2-azetidinone $\cdots\text{H}_2\text{O}$

| $^{18}\text{O}_{\text{B}}/^{16}\text{O}_{\text{B}}$ |                       |         |             |                  |                    |                       |         |             |                  |           |       |  |  |
|-----------------------------------------------------|-----------------------|---------|-------------|------------------|--------------------|-----------------------|---------|-------------|------------------|-----------|-------|--|--|
| $J'K'_{-1}K'_{+1}$                                  | $J''K''_{-1}K''_{+1}$ | $F'F''$ | <i>obs.</i> | <i>obs.-cal.</i> | $J'K'_{-1}K'_{+1}$ | $J''K''_{-1}K''_{+1}$ | $F'F''$ | <i>obs.</i> | <i>obs.-cal.</i> |           |       |  |  |
| 2 0 2                                               | 1 0 1                 | 3 2     | 7278.043    | 0.000            | 4 0 4              | 3 0 3                 | 5 4     | 14293.48    | 0.002            |           |       |  |  |
|                                                     |                       | 2 1     | 7278.174    | 0.003            |                    |                       | 3 2     | 14293.513   | -0.004           |           |       |  |  |
|                                                     |                       | 1 0     | 7278.576    | -0.005           |                    |                       | 4 3     | 14293.659   | 0.001            |           |       |  |  |
|                                                     |                       | 2 2     | -           | -                |                    |                       | 4 4     | -           | -                |           |       |  |  |
| 3 0 3                                               | 2 0 2                 | 2 2     | -           | -                | 4 1 4              | 3 1 3                 | 5 4     | 13637.202   | 0.001            |           |       |  |  |
|                                                     |                       | 4 3     | 10832.894   | 0.001            |                    |                       | 3 2     | 13637.3     | 0.001            |           |       |  |  |
|                                                     |                       | 2 1     | 10833       | 0.002            |                    |                       | 4 3     | 13637.344   | 0.000            |           |       |  |  |
|                                                     |                       | 3 2     | 10833.043   | -0.003           |                    |                       | 4 1 3   | 3 1 2       | 3 2              | 15474.239 | 0.001 |  |  |
|                                                     |                       | 3 3     | -           | -                |                    |                       | 5 4     | 15474.297   | 0.000            |           |       |  |  |
| 3 1 3                                               | 2 1 2                 | 2 2     | -           | -                | 1 1 1              | 0 0 0                 | 4 3     | 15474.409   | 0.000            |           |       |  |  |
|                                                     |                       | 4 3     | 10255.154   | 0.000            |                    |                       | 0 1     | 8096.76     | -0.003           |           |       |  |  |
|                                                     |                       | 2 1     | 10255.311   | -0.003           |                    |                       | 2 1     | 8097.48     | 0.000            |           |       |  |  |
|                                                     |                       | 3 2     | 10255.404   | 0.001            |                    |                       | 1 1     | 8097.959    | 0.002            |           |       |  |  |
|                                                     |                       | 3 3     | -           | -                |                    |                       | 2 1 2   | 1 0 1       | 3 2              | 11291.86  | 0.002 |  |  |
| 3 1 2                                               | 2 1 1                 | 3 3     | -           | -                | 2 1 2              | 1 0 1                 | 1 0     | 11292.152   | -0.005           |           |       |  |  |
|                                                     |                       | 2 1     | 11638.405   | 0.001            |                    |                       | 2 1     | 11292.42    | 0.004            |           |       |  |  |
|                                                     |                       | 4 3     | 11638.576   | 0.000            |                    |                       |         |             |                  |           |       |  |  |
|                                                     |                       | 3 2     | 11638.763   | -0.002           |                    |                       |         |             |                  |           |       |  |  |
|                                                     |                       | 2 2     | -           | -                |                    |                       |         |             |                  |           |       |  |  |

**Table S4.** Observed and calculated frequencies (MHz) for the monodeuterated species of the 1:1a complex of 2-azetidinone $\cdots$ H<sub>2</sub>O

| <i>J'</i> | <i>K'_{-1}</i> | <i>K'_{+1}</i> | <i>J''</i> | <i>K''_{-1}</i> | <i>K''_{+1}</i> | <i>F'</i> | <i>F''</i> | <b>D<sub>a</sub>/H<sub>a</sub></b> |                 | <b>D<sub>b</sub>/H<sub>b</sub></b> |                 | <b>D<sub>c</sub>/H<sub>c</sub></b> |                 |          |
|-----------|----------------|----------------|------------|-----------------|-----------------|-----------|------------|------------------------------------|-----------------|------------------------------------|-----------------|------------------------------------|-----------------|----------|
|           |                |                |            |                 |                 |           |            | <i>obs.</i>                        | <i>obs.-cal</i> | <i>obs.</i>                        | <i>obs.-cal</i> | <i>Obs.</i>                        | <i>obs.-cal</i> |          |
| 2         | 0              | 2              | 1          | 0               | 1               | 3         | 2          | 7633.116                           | -0.002          | 7527.277                           | -0.001          | 7324.7286                          | 0.00313         |          |
|           |                |                |            |                 |                 |           | 2          | 1                                  | 7633.259        | -0.001                             | 7527.413        | 0.001                              | 7324.8524       | -0.00144 |
|           |                |                |            |                 |                 |           | 1          | 0                                  | 7633.648        | -0.001                             | -               | -                                  | 7325.2658       | 0.00189  |
|           |                |                |            |                 |                 |           | 2          | 2                                  | 7633.908        | 0.003                              | 7528.056        | -0.001                             | 7325.4999       | 0.00045  |
| 3         | 0              | 3              | 2          | 0               | 2               | 2         | 2          | 11337.798                          | -0.001          | 11194.755                          | -0.002          | 10900.9311                         | -0.00305        |          |
|           |                |                |            |                 |                 | 4         | 3          | 11338.923                          | 0.000           | 11195.865                          | 0.000           | 10902.0345                         | 0.00173         |          |
|           |                |                |            |                 |                 | 2         | 1          | -                                  | -               | 11195.967                          | -0.002          | 10902.126                          | -0.01206        |          |
|           |                |                |            |                 |                 | 3         | 2          | 11339.096                          | -0.001          | 11196.023                          | -0.002          | 10902.1878                         | 0.00142         |          |
|           |                |                |            |                 |                 | 3         | 3          | 11339.890                          | 0.005           | 11196.805                          | 0.000           | 10902.9597                         | -0.00066        |          |
| 3         | 1              | 3              | 2          | 1               | 2               | 2         | 2          | 10710.540                          | -0.003          | 10588.712                          | -0.003          | -                                  | -               |          |
|           |                |                |            |                 |                 | 4         | 3          | 10712.259                          | 0.002           | 10590.427                          | -0.001          | 10320.7755                         | 0.00203         |          |
|           |                |                |            |                 |                 | 2         | 1          | 10712.417                          | 0.000           | -                                  | -               | 10320.9327                         | -0.00103        |          |
|           |                |                |            |                 |                 | 3         | 2          | 10712.509                          | -0.002          | 10590.674                          | -0.005          | 10321.0233                         | 0.00054         |          |
|           |                |                |            |                 |                 | 3         | 3          | 10713.716                          | 0.002           | 10591.887                          | 0.004           | 10322.227                          | 0.00023         |          |
| 3         | 1              | 2              | 2          | 1               | 1               | 3         | 3          | 12265.601                          | 0.003           | 12058.511                          | 0.003           | 11713.3099                         | 0.00513         |          |
|           |                |                |            |                 |                 | 2         | 1          | 12265.745                          | 0.001           | 12058.663                          | 0.005           | 11713.4559                         | -0.00103        |          |
|           |                |                |            |                 |                 | 4         | 3          | 12265.911                          | -0.006          | 12058.829                          | -0.001          | 11713.6275                         | -0.00091        |          |
|           |                |                |            |                 |                 | 3         | 2          | 12266.109                          | -0.001          | 12059.016                          | -0.005          | 11713.8157                         | -0.00131        |          |
|           |                |                |            |                 |                 | 2         | 2          | 12266.543                          | 0.002           | -                                  | -               | -                                  | -               |          |
| 4         | 0              | 4              | 3          | 0               | 3               | 5         | 4          | 14923.895                          | 0.002           | 14758.983                          | 0.001           | 14384.1376                         | 0.00247         |          |
|           |                |                |            |                 |                 | 3         | 2          | -                                  | -               | -                                  | -               | -                                  | -               |          |
|           |                |                |            |                 |                 | 4         | 3          | 14924.092                          | -0.004          | 14759.172                          | 0.001           | 14384.3165                         | 0.00042         |          |
|           |                |                |            |                 |                 | 4         | 4          | -                                  | -               | -                                  | -               | 14385.2455                         | 0.00183         |          |
| 4         | 1              | 4              | 3          | 1               | 3               | 5         | 4          | -                                  | -               | 14079.707                          | 0.000           | -                                  | -               |          |
|           |                |                |            |                 |                 | 3         | 2          | -                                  | -               | 14079.812                          | 0.008           | -                                  | -               |          |
|           |                |                |            |                 |                 | 4         | 3          | -                                  | -               | 14079.848                          | -0.003          | -                                  | -               |          |

**Table S5.** Observed and calculated frequencies (MHz) for the parent species of the 1:1b complex of 2-azetidinone $\cdots$ H<sub>2</sub>O

| $J'K'_{-1}K'_{+1}$ | $J''K''_{-1}K''_{+1}$ | $F'F''$ | <i>obs.</i> | <i>obs.-cal.</i> | $J'K'_{-1}K'_{+1}$ | $J''K''_{-1}K''_{+1}$ | $F'F''$ | <i>obs.</i> | <i>obs.-cal.</i> |
|--------------------|-----------------------|---------|-------------|------------------|--------------------|-----------------------|---------|-------------|------------------|
| 2 0 2              | 1 0 1                 | 1 1     | 7151.964    | 0.003            | 3 2 1              | 2 2 0                 | 2 1     | 10881.373   | 0.000            |
|                    |                       | 3 2     | 7152.790    | -0.001           |                    |                       | 4 3     | 10881.635   | -0.001           |
|                    |                       | 2 1     | 7152.912    | 0.000            |                    |                       | 3 2     | 10882.026   | -0.002           |
|                    |                       | 1 0     | 7153.190    | 0.002            | 4 0 4              | 3 1 3                 | 4 3     | 10317.865   | 0.001            |
|                    |                       | 2 2     | 7153.403    | 0.001            |                    |                       | 3 2     | 10318.660   | -0.001           |
| 2 1 1              | 1 1 0                 | 3 2     | 7608.966    | 0.001            |                    |                       | 3 3     | 14088.325   | -0.001           |
|                    |                       | 2 1     | 7609.407    | 0.000            |                    |                       | 5 4     | 14089.333   | -0.001           |
| 3 0 3              | 2 0 2                 | 2 2     | 10659.375   | -0.001           |                    |                       | 3 2     | 14089.361   | 0.004            |
|                    |                       | 4 3     | 10660.254   | 0.000            |                    |                       | 4 3     | 14089.519   | -0.001           |
|                    |                       | 2 1     | 10660.331   | 0.004            | 4 1 4              | 3 1 3                 | 5 4     | 13452.112   | -0.001           |
|                    |                       | 3 2     | 10660.408   | 0.001            |                    |                       | 3 2     | 13452.216   | -0.001           |
|                    |                       | 3 3     | 10661.018   | 0.000            |                    |                       | 4 3     | 13452.240   | -0.001           |
| 3 1 3              | 2 1 2                 | 2 2     | 10109.851   | -0.002           |                    |                       | 4 4     | 13453.718   | 0.001            |
|                    |                       | 4 3     | 10111.636   | 0.001            | 4 1 3              | 3 1 2                 | 3 2     | 15158.097   | 0.001            |
|                    |                       | 3 3     | 10113.108   | -0.003           |                    |                       | 4 3     | 15158.264   | 0.000            |
| 3 1 2              | 2 1 1                 | 3 3     | 11394.689   | -0.002           | 4 2 3              | 3 2 2                 | 3 2     | 14339.467   | 0.000            |
|                    |                       | 2 1     | 11395.093   | 0.000            |                    |                       | 5 4     | 14339.530   | 0.000            |
|                    |                       | 4 3     | 11395.292   | -0.001           |                    |                       | 4 3     | 14339.772   | -0.002           |
|                    |                       | 3 2     | 11395.430   | -0.001           | 4 2 2              | 3 2 1                 | 5 4     | 14611.033   | 0.002            |
|                    |                       | 2 2     | 11396.243   | -0.001           |                    |                       | 4 3     | 14611.101   | -0.001           |
| 3 2 2              | 2 2 1                 | 2 1     | 10770.742   | -0.001           | 5 1 5              | 4 1 4                 | 6 5     | 16769.952   | 0.001            |
|                    |                       | 4 3     | 10771.039   | 0.005            | 2 1 2              | 1 0 1                 | 3 2     | 11472.356   | 0.000            |
|                    |                       | 3 2     | 10771.562   | 0.002            |                    |                       | 2 1     | 11473.131   | 0.000            |
|                    |                       |         |             |                  | 3 1 3              | 2 0 2                 | 4 3     | 14431.201   | 0.001            |
|                    |                       |         |             |                  |                    |                       | 3 2     | 14432.061   | -0.002           |

**Table S6.** Observed and calculated frequencies (MHz) for the <sup>18</sup>O species of the 1:1b complex of 2-azetidinone $\cdots$ H<sub>2</sub>O

| <sup>18</sup> O <sub>B</sub> / <sup>16</sup> O <sub>B</sub> |                       |         |             |                  |                    |                       |         |             |                  |
|-------------------------------------------------------------|-----------------------|---------|-------------|------------------|--------------------|-----------------------|---------|-------------|------------------|
| $J'K'_{-1}K'_{+1}$                                          | $J''K''_{-1}K''_{+1}$ | $F'F''$ | <i>obs.</i> | <i>obs.-cal.</i> | $J'K'_{-1}K'_{+1}$ | $J''K''_{-1}K''_{+1}$ | $F'F''$ | <i>obs.</i> | <i>obs.-cal.</i> |
| 2 0 2                                                       | 1 0 1                 | 3 2     | 6782.553    | 0.000            | 4 0 4              | 3 0 3                 | 5 4     | 13388.117   | 0.000            |
|                                                             |                       | 2 1     | 6782.669    | 0.004            |                    |                       | 3 2     | 13388.141   | 0.000            |
|                                                             |                       | 1 0     | 6782.952    | -0.003           |                    |                       | 4 3     | 13388.288   | 0.001            |
| 3 0 3                                                       | 2 0 2                 | 4 3     | 10117.626   | 0.000            | 4 1 4              | 3 1 3                 | 5 4     | 12791.170   | 0.002            |
|                                                             |                       | 2 1     | 10117.699   | -0.001           |                    |                       | 3 2     | 12791.267   | -0.005           |
|                                                             |                       | 3 2     | 10117.765   | 0.000            |                    |                       | 4 3     | 12791.294   | 0.002            |
| 3 1 3                                                       | 2 1 2                 | 4 3     | 9611.883    | 0.001            | 4 1 3              | 3 1 2                 | 3 2     | 14338.237   | 0.001            |
|                                                             |                       | 3 2     | 9612.089    | -0.001           |                    |                       | 5 4     | 14338.315   | 0.002            |
| 3 1 2                                                       | 2 1 1                 | 2 1     | 10775.074   | -0.001           |                    |                       | 4 3     | 14338.394   | -0.003           |
|                                                             |                       | 4 3     | 10775.275   | 0.000            |                    |                       |         |             |                  |
|                                                             |                       | 3 2     | 10775.410   | 0.000            |                    |                       |         |             |                  |

**Table S7.** Observed and calculated frequencies (MHz) for the monodeuterated species of the 1:1b complex of 2-azetidinone··H<sub>2</sub>O

|                                                |                                                   |                     |                    |                         |                    |                         |                    | <b>D<sub>a</sub>/H<sub>a</sub></b> |                    | <b>D<sub>b</sub>/H<sub>b</sub></b> |  | <b>D<sub>c</sub>/H<sub>c</sub></b> |  |
|------------------------------------------------|---------------------------------------------------|---------------------|--------------------|-------------------------|--------------------|-------------------------|--------------------|------------------------------------|--------------------|------------------------------------|--|------------------------------------|--|
| <b><i>J'K'<sub>-1</sub>K'<sub>+1</sub></i></b> | <b><i>J''K''<sub>-1</sub>K''<sub>+1</sub></i></b> | <b><i>F'F''</i></b> | <b><i>obs.</i></b> | <b><i>obs.-cal.</i></b> | <b><i>obs.</i></b> | <b><i>obs.-cal.</i></b> | <b><i>obs.</i></b> | <b><i>obs.-cal.</i></b>            | <b><i>obs.</i></b> | <b><i>obs.-cal.</i></b>            |  |                                    |  |
| 2 0                                            | 2 1                                               | 0 1                 | 3 2                | 7008.263                | -0.004             | 7035.434                | -0.005             | 6849.123                           | -0.001             |                                    |  |                                    |  |
| 3 0                                            | 3 2                                               | 0 2                 | 4 3                | 10443.623               | -0.001             | 10488.969               | -0.001             | 10215.989                          | -0.001             |                                    |  |                                    |  |
|                                                |                                                   |                     | 3 2                | 10443.776               | -0.002             | 10489.114               | -0.004             | -                                  | -                  |                                    |  |                                    |  |
| 3 1                                            | 3 2                                               | 1 2                 | 4 3                | 9903.847                | 0.000              | 9954.763                | 0.002              | 9703.974                           | -0.001             |                                    |  |                                    |  |
|                                                |                                                   |                     | 3 2                | 9904.059                | 0.002              | 9954.971                | 0.001              | 9704.185                           | 0.002              |                                    |  |                                    |  |
| 3 1                                            | 2 2                                               | 1 1                 | 2 1                | -                       | -                  | -                       | -                  | 10883.734                          | 0.000              |                                    |  |                                    |  |
|                                                |                                                   |                     | 4 3                | 11169.410               | 0.002              | 11196.720               | 0.003              | 10883.934                          | 0.000              |                                    |  |                                    |  |
|                                                |                                                   |                     | 3 2                | 11169.546               | 0.000              | -                       | -                  | 10884.069                          | 0.000              |                                    |  |                                    |  |
| 4 0                                            | 4 3                                               | 0 3                 | 5 4                | 13800.877               | 0.001              | 13869.218               | -0.003             | 13516.636                          | 0.002              |                                    |  |                                    |  |
|                                                |                                                   |                     | 4 3                | 13801.066               | 0.001              | 13869.407               | 0.006              | 13516.805                          | -0.001             |                                    |  |                                    |  |

**Table S8.** Observed and calculated frequencies (MHz) for the parent species of the 2-azetidinone $\cdots$ (H<sub>2</sub>O)<sub>2</sub> complex.

| $J'K'_-J'K'_+$ | $J''K''_-J''K''_+$ | $F'F''$ | <i>obs.</i> | <i>obs.-cal.</i> | $J'K'_-J'K'_+$ | $J''K''_-J''K''_+$ | $F'F''$ | <i>obs.</i> | <i>obs.-cal.</i> |           |        |
|----------------|--------------------|---------|-------------|------------------|----------------|--------------------|---------|-------------|------------------|-----------|--------|
| 3 0            | 3 2                | 0 2     | 4 3         | 6876.645         | 0.000          | 5 1                | 4 4     | 1 3         | 4 3              | 12504.053 | 0.001  |
|                |                    |         | 2 1         | 6876.710         | -0.003         |                    |         |             | 6 5              | 12504.094 | -0.001 |
|                |                    |         | 3 2         | 6876.876         | 0.001          |                    |         |             | 5 4              | 12504.252 | 0.000  |
| 3 1            | 3 2                | 1 2     | 4 3         | 6468.076         | 0.000          | 5 2                | 4 4     | 2 3         | 4 3              | 11693.438 | -0.002 |
|                |                    |         | 2 1         | 6468.220         | -0.001         |                    |         |             | 6 5              | 11693.464 | 0.002  |
|                |                    |         | 3 2         | 6468.308         | -0.002         |                    |         |             | 5 4              | 11693.649 | 0.002  |
| 3 1            | 2 2                | 1 1     | 3 3         | 7640.579         | -0.001         | 5 2                | 3 4     | 2 2         | 6 5              | 12564.143 | 0.004  |
|                |                    |         | 2 1         | 7640.743         | 0.000          | 5 3                | 3 4     | 3 2         | 4 3              | 11957.843 | 0.006  |
|                |                    |         | 4 3         | 7640.915         | 0.001          |                    |         |             | 6 5              | 11957.900 | -0.002 |
|                |                    |         | 3 2         | 7641.096         | 0.000          |                    |         |             | 5 4              | 11958.145 | 0.001  |
|                |                    |         | 2 2         | 7641.547         | -0.001         | 6 0                | 6 5     | 0 5         | 7 6              | 12879.070 | -0.001 |
| 3 2            | 2 2                | 2 1     | 2 1         | 7088.626         | 0.002          |                    |         |             | 5 4              | 12879.092 | 0.002  |
| 3 2            | 1 2                | 2 0     | 2 1         | 7301.123         | -0.003         |                    |         |             | 6 5              | 12879.249 | 0.000  |
|                |                    |         | 4 3         | 7301.397         | -0.007         | 6 1                | 6 5     | 1 5         | 7 6              | 12676.604 | 0.002  |
|                |                    |         | 3 2         | 7301.773         | -0.003         |                    |         |             | 5 4              | 12676.639 | -0.002 |
| 4 0            | 4 3                | 0 3     | 3 3         | 8957.083         | -0.001         |                    |         |             | 6 5              | 12676.703 | 0.000  |
|                |                    |         | 5 4         | 8958.345         | 0.000          | 6 1                | 5 5     | 1 4         | 5 4              | 14785.394 | 0.006  |
|                |                    |         | 3 2         | 8958.368         | -0.001         |                    |         |             | 7 6              | 14785.420 | -0.002 |
|                |                    |         | 4 3         | 8958.594         | 0.000          |                    |         |             | 6 5              | 14785.610 | -0.001 |
|                |                    |         | 4 4         | 8959.545         | -0.001         | 6 2                | 5 5     | 2 4         | 5 4              | 13934.733 | -0.002 |
| 4 1            | 4 3                | 1 3     | 3 3         | 8568.737         | -0.001         |                    |         |             | 7 6              | 13934.743 | 0.000  |
|                |                    |         | 5 4         | 8570.449         | 0.001          |                    |         |             | 6 5              | 13934.891 | 0.000  |
|                |                    |         | 3 2         | 8570.533         | -0.001         | 6 2                | 4 5     | 2 3         | 6 5              | 15221.244 | -0.003 |
|                |                    |         | 4 3         | 8570.598         | -0.001         |                    |         |             | 7 6              | 15221.261 | 0.000  |
|                |                    |         | 4 4         | 8571.929         | 0.000          | 6 3                | 4 5     | 3 3         | 5 4              | 14363.502 | -0.006 |
| 4 1            | 3 3                | 1 2     | 3 2         | 10111.911        | 0.002          |                    |         |             | 7 6              | 14363.534 | -0.001 |
|                |                    |         | 5 4         | 10111.978        | 0.000          |                    |         |             | 6 5              | 14363.678 | -0.002 |
|                |                    |         | 4 3         | 10112.120        | 0.001          | 6 4                | 2 5     | 4 1         | 5 4              | 14372.319 | 0.006  |
|                |                    |         | 3 3         | 10112.362        | 0.001          |                    |         |             | 7 6              | 14372.367 | -0.001 |
| 4 2            | 3 3                | 2 2     | 3 2         | 9409.110         | -0.002         |                    |         |             | 6 5              | 14372.597 | -0.001 |
|                |                    |         | 5 4         | 9409.187         | 0.003          | 4 0                | 4 3     | 1 3         | 4 3              | 7805.090  | -0.002 |
|                |                    |         | 4 3         | 9409.468         | 0.002          |                    |         |             | 5 4              | 7805.220  | 0.000  |
| 5 0            | 5 4                | 0 4     | 6 5         | 10941.603        | 0.000          |                    |         |             | 3 2              | 7805.379  | 0.001  |
|                |                    |         | 4 3         | 10941.627        | 0.006          | 4 1                | 4 3     | 0 3         | 5 4              | 9723.577  | 0.004  |
|                |                    |         | 5 4         | 10941.830        | 0.001          |                    |         |             | 4 3              | 9724.106  | 0.005  |
| 5 1            | 5 4                | 1 4     | 4 4         | 10637.074        | -0.002         | 5 0                | 5 4     | 1 4         | 5 4              | 10176.324 | 0.002  |
|                |                    |         | 6 5         | 10638.882        | 0.000          |                    |         |             | 6 5              | 10176.376 | 0.001  |
|                |                    |         | 4 3         | 10638.940        | 0.003          | 5 1                | 5 4     | 0 4         | 4 3              | 11404.091 | -0.002 |
|                |                    |         | 5 4         | 10639.001        | 0.000          |                    |         |             | 6 5              | 11404.116 | 0.006  |
|                |                    |         | 5 5         | 10640.481        | 0.000          |                    |         |             | 5 4              | 11404.490 | -0.017 |

**Table S9.** Observed and calculated frequencies (MHz) for the  $^{18}\text{O}$  species of the of 2-azetidinone $\cdots(\text{H}_2\text{O})_2$  complex.

|      |           |           |       |            |            |      | $^{18}\text{O}_\text{A}/^{16}\text{O}_\text{A}$ |             | $^{18}\text{O}_\text{B}/^{16}\text{O}_\text{B}$ |             |                  |
|------|-----------|-----------|-------|------------|------------|------|-------------------------------------------------|-------------|-------------------------------------------------|-------------|------------------|
| $J'$ | $K'_{-1}$ | $K'_{+1}$ | $J''$ | $K''_{-1}$ | $K''_{+1}$ | $F'$ | $F''$                                           | <i>obs.</i> | <i>obs.-cal.</i>                                | <i>Obs.</i> | <i>obs.-cal.</i> |
| 4    | 0         | 4         | 3     | 0          | 3          | 5    | 4                                               | 8700.937    | 0.000                                           | -           | -                |
|      |           |           |       |            |            | 3    | 2                                               | 8700.963    | 0.001                                           | -           | -                |
|      |           |           |       |            |            | 4    | 3                                               | 8701.180    | -0.001                                          | -           | -                |
| 4    | 1         | 4         | 3     | 1          | 3          | 5    | 4                                               | 8317.713    | 0.000                                           | 8342.721    | -0.001           |
|      |           |           |       |            |            | 3    | 2                                               | 8317.798    | 0.000                                           | 8342.805    | 0.000            |
|      |           |           |       |            |            | 4    | 3                                               | 8317.860    | 0.000                                           | 8342.870    | 0.000            |
| 4    | 1         | 3         | 3     | 1          | 2          | 3    | 2                                               | 9786.284    | -0.001                                          | 9858.668    | -0.002           |
|      |           |           |       |            |            | 5    | 4                                               | 9786.351    | 0.000                                           | 9858.738    | -0.003           |
|      |           |           |       |            |            | 4    | 3                                               | 9786.490    | 0.001                                           | 9858.881    | -0.002           |
| 5    | 0         | 5         | 4     | 0          | 4          | 6    | 5                                               | 10635.327   | -0.001                                          | 10643.093   | -0.001           |
|      |           |           |       |            |            | 4    | 3                                               | 10635.344   | 0.001                                           | 10643.113   | 0.003            |
|      |           |           |       |            |            | 5    | 4                                               | 10635.551   | -0.001                                          | 10643.320   | -0.002           |
| 5    | 1         | 5         | 4     | 1          | 4          | 6    | 5                                               | 10328.836   | -0.001                                          | 10354.265   | -0.001           |
|      |           |           |       |            |            | 5    | 4                                               | 10328.953   | -0.001                                          | 10354.384   | 0.000            |
|      |           |           |       |            |            | 4    | 3                                               | -           | -                                               | 12185.817   | 0.003            |
| 5    | 1         | 4         | 4     | 1          | 3          | 4    | 3                                               | 12111.015   | 0.001                                           | -           | -                |
|      |           |           |       |            |            | 6    | 5                                               | 12111.054   | 0.000                                           | 12185.859   | 0.001            |
|      |           |           |       |            |            | 5    | 4                                               | 12111.204   | -0.001                                          | 12186.021   | 0.002            |
| 6    | 0         | 6         | 5     | 0          | 5          | 7    | 6                                               | 12521.520   | -0.001                                          | 12526.150   | -0.001           |
|      |           |           |       |            |            | 5    | 4                                               | 12521.541   | 0.002                                           | 12526.171   | 0.000            |
|      |           |           |       |            |            | 6    | 5                                               | 12521.700   | -0.001                                          | 12526.330   | 0.000            |
| 5    | 0         | 5         | 4     | 1          | 4          | 5    | 4                                               | 9832.936    | -0.003                                          | 9924.896    | 0.002            |
|      |           |           |       |            |            | 6    | 5                                               | 9833.012    | 0.004                                           | 9924.946    | 0.002            |
|      |           |           |       |            |            | 4    | 3                                               | 9833.101    | 0.000                                           | 9925.031    | -0.002           |
| 5    | 1         | 5         | 4     | 0          | 4          | 4    | 3                                               | 11131.131   | -0.004                                          | 11072.395   | -0.003           |
|      |           |           |       |            |            | 6    | 5                                               | 11131.161   | 0.005                                           | 11072.421   | 0.005            |
|      |           |           |       |            |            | 5    | 4                                               | 11131.567   | 0.000                                           | 11072.810   | -0.002           |



**Table S10.** Observed and calculated frequencies (MHz) for the monodeuterated species of the of 2-azetidinone···(H<sub>2</sub>O)<sub>2</sub> complex.

|                                         |                                            |              |             |                  |             |                  | <b>D<sub>a</sub>/H<sub>a</sub></b> |                  | <b>D<sub>b</sub>/H<sub>b</sub></b> |                  | <b>D<sub>c</sub>/H<sub>c</sub></b> |                  | <b>D<sub>d</sub>/H<sub>d</sub></b> |                  | <b>D<sub>e</sub>/H<sub>e</sub></b> |                  |
|-----------------------------------------|--------------------------------------------|--------------|-------------|------------------|-------------|------------------|------------------------------------|------------------|------------------------------------|------------------|------------------------------------|------------------|------------------------------------|------------------|------------------------------------|------------------|
| <i>J'K'<sub>-1</sub>K'<sub>+1</sub></i> | <i>J''K''<sub>-1</sub>K''<sub>+1</sub></i> | <i>F'F''</i> | <i>obs.</i> | <i>obs.-cal.</i> | <i>obs.</i> | <i>obs.-cal.</i> | <i>obs.</i>                        | <i>obs.-cal.</i> | <i>obs.</i>                        | <i>obs.-cal.</i> | <i>obs.</i>                        | <i>obs.-cal.</i> | <i>obs.</i>                        | <i>obs.-cal.</i> | <i>obs.</i>                        | <i>obs.-cal.</i> |
| 3 0                                     | 3 2                                        | 0 2          | 4 3         | -                | -           | 6820.800         | 0.004                              | 6718.825         | -0.001                             | 6784.290         | 0.003                              | 6731.740         | -0.001                             |                  |                                    |                  |
| 4 0                                     | 4 3                                        | 0 3          | 5 4         | 8936.058         | -0.001      | 8883.468         | 0.001                              | 8757.790         | 0.001                              | 8844.035         | -0.005                             | 8764.934         | -0.001                             |                  |                                    |                  |
|                                         |                                            |              | 4 3         | 8936.307         | -0.004      | -                | -                                  | 8758.034         | -0.003                             | 8844.283         | -0.003                             | 8765.190         | 0.003                              |                  |                                    |                  |
| 4 1                                     | 4 3                                        | 1 3          | 5 4         | 8552.464         | -0.001      | 8500.010         | -0.005                             | 8376.762         | 0.001                              | 8457.371         | 0.000                              | 8389.717         | -0.001                             |                  |                                    |                  |
|                                         |                                            |              | 3 2         | -                | -           | -                | -                                  | 8376.845         | -0.002                             | 8457.452         | -0.004                             | -                | -                                  |                  |                                    |                  |
|                                         |                                            |              | 4 3         | -                | -           | -                | -                                  | 8376.910         | 0.000                              | 8457.520         | 0.000                              | 8389.872         | 0.003                              |                  |                                    |                  |
| 4 1                                     | 3 3                                        | 1 2          | 3 2         | -                | -           | -                | -                                  | 9866.983         | 0.000                              | -                | -                                  | 9908.532         | -0.001                             |                  |                                    |                  |
|                                         |                                            |              | 5 4         | 10105.277        | -0.002      | 10034.921        | 0.001                              | 9867.050         | 0.000                              | 9962.184         | 0.003                              | 9908.602         | 0.000                              |                  |                                    |                  |
|                                         |                                            |              | 4 3         | 10105.424        | 0.000       | 10035.064        | 0.000                              | 9867.191         | 0.001                              | 9962.320         | -0.001                             | 9908.745         | -0.002                             |                  |                                    |                  |
| 5 0                                     | 5 4                                        | 0 4          | 6 5         | 10910.318        | -0.003      | 10848.489        | 0.000                              | 10700.845        | 0.000                              | 10806.730        | -0.002                             | 10702.090        | -0.002                             |                  |                                    |                  |
|                                         |                                            |              | 4 3         | -                | -           | -                | -                                  | -                | -                                  | 10806.749        | 0.000                              | -                | -                                  |                  |                                    |                  |
|                                         |                                            |              | 5 4         | 10910.545        | -0.001      | 10848.713        | -0.001                             | 10701.069        | -0.001                             | 10806.956        | -0.001                             | 10702.317        | -0.001                             |                  |                                    |                  |
| 5 1                                     | 5 4                                        | 1 4          | 6 5         | 10614.628        | 0.004       | 10550.679        | 0.001                              | 10400.283        | 0.001                              | 10500.691        | 0.002                              | 10412.851        | 0.000                              |                  |                                    |                  |
|                                         |                                            |              | 5 4         | 10614.740        | -0.003      | 10550.800        | 0.003                              | 10400.400        | 0.000                              | 10500.806        | -0.001                             | 10412.969        | -0.001                             |                  |                                    |                  |
| 5 1                                     | 4 4                                        | 1 3          | 6 5         | 12490.626        | -0.003      | 12406.776        | 0.001                              | -                | -                                  | -                | -                                  | -                | -                                  |                  |                                    |                  |
|                                         |                                            |              | 5 4         | 12490.794        | 0.005       | 12406.931        | -0.002                             | 12205.986        | 0.000                              | -                | -                                  | 12248.027        | 0.003                              |                  |                                    |                  |
| 6 0                                     | 6 5                                        | 0 5          | 7 6         | 12840.881        | 0.002       | 12768.857        | 0.000                              | 12597.604        | 0.001                              | 12722.033        | 0.003                              | 12596.500        | 0.000                              |                  |                                    |                  |
|                                         |                                            |              | 6 5         | 12841.060        | 0.004       | 12769.033        | -0.001                             | 12597.783        | 0.001                              | 12722.212        | 0.003                              | 12596.676        | 0.000                              |                  |                                    |                  |
